# Supplementary material
Source: publisher site journal article supplement (https://www.dovepress.com/article/421180)
Supplement: Supplementary file 1 [file get_supplementary_file.php]

# University Pre-Professional Program: A Transitional Phase from Didactic to PBL Pedagogy

\*\*\* Just put ✓ in the

\*\*\* فقط ضع ✓ في

Part 1

Demographic characteristics:

الخصائص الديموغرافية:

|   |                                                                                                                                                                                                      |                                                                                                                                                                                                                 |
|---|------------------------------------------------------------------------------------------------------------------------------------------------------------------------------------------------------|-----------------------------------------------------------------------------------------------------------------------------------------------------------------------------------------------------------------|
| 1 | <b>Age:</b> _____ years old                                                                                                                                                                          | العمر: _____ سنة                                                                                                                                                                                                |
| 2 | <b>Gender:</b><br><input type="checkbox"/> Male <input type="checkbox"/> Female                                                                                                                      | الجنس:<br><input type="checkbox"/> ذكر <input type="checkbox"/> أنثى                                                                                                                                            |
| 3 | <b>The school you graduated from is:</b><br><input type="checkbox"/> Private School<br><input type="checkbox"/> International School<br><input type="checkbox"/> Local Saudi School                  | المدرسة التي تخرجت منها هي:<br><input type="checkbox"/> مدرسة خاصة/ أهلية<br><input type="checkbox"/> مدرسة عالمية<br><input type="checkbox"/> مدرسة حكومية سعودية                                              |
| 4 | <b>At COSHP your group is:</b><br><input type="checkbox"/> PMED<br><input type="checkbox"/> PDENT<br><input type="checkbox"/> PPHR<br><input type="checkbox"/> PAMS<br><input type="checkbox"/> PHIS | في كلية العلوم والمهن الصحية، مجموعتك هي:<br><input type="checkbox"/> PMED<br><input type="checkbox"/> PDENT<br><input type="checkbox"/> PPHR<br><input type="checkbox"/> PAMS<br><input type="checkbox"/> PHIS |
| 5 | <b>Are you currently repeating the 4<sup>th</sup> semester or any of its courses?</b><br><input type="checkbox"/> Yes<br><input type="checkbox"/> No                                                 | هل أنت حالياً تعيد دراسة الترم الرابع أو أي من موادها؟<br><input type="checkbox"/> نعم<br><input type="checkbox"/> لا                                                                                           |
| 6 | <b>One of your siblings study or studied at KSAU-HS:</b><br><input type="checkbox"/> Yes<br><input type="checkbox"/> No                                                                              | شقيقك/ شقيقتك يدرس أو درس في جامعة الملك سعود بن عبدالعزيز للعلوم الصحية:<br><input type="checkbox"/> نعم<br><input type="checkbox"/> لا                                                                        |
| 7 | <b>One of your parents or siblings are related to healthcare profession:</b><br><input type="checkbox"/> Yes<br><input type="checkbox"/> No                                                          | أحد والديك أو أخوتك له علاقة بالمجال الصحي:<br><input type="checkbox"/> نعم<br><input type="checkbox"/> لا                                                                                                      |

## Part 2

Students' knowledge about student centered learning methods (PBL, CBL, SDL) before and after completion of 4<sup>th</sup> semester courses in the UPPP.

معرفة الطلاب عن أساليب التعليم المتمحورة حول الطالب (PBL, CBL, SDL) قبل وبعد اكمال البرامج المتقدمة ضمن البرنامج التحضيري (ما قبل المهني) في جامعة الملك سعود بن عبدالعزيز للعلوم الصحية.

|   | Question / Statement<br>السؤال / العبارة                                                                                                                                                                                                    | Yes<br>نعم               | No<br>لا                 | Don't know<br>لا أعلم    |
|---|---------------------------------------------------------------------------------------------------------------------------------------------------------------------------------------------------------------------------------------------|--------------------------|--------------------------|--------------------------|
| 1 | The University's Pre-Professional Program (UPPP) has traditional teacher centered curriculum<br>لبرنامج السنة التحضيرية بالجامعة نظام تعليم تقليدي يتمحور حول المعلم.                                                                       | <input type="checkbox"/> | <input type="checkbox"/> | <input type="checkbox"/> |
| 2 | The UPPP has student centered curriculum with problem-based (PBL) approaches<br>لبرنامج السنة التحضيرية بجامعة الملك سعود بن عبدالعزيز للعلوم الصحية أسلوب تعليم يتمحور حول الطالب، مع التعليم القائم على حل المشكلات (PBL) وأساليب تعليمية | <input type="checkbox"/> | <input type="checkbox"/> | <input type="checkbox"/> |
| 3 | In the PBL curriculum, learning revolves around the clinical cases<br>في أسلوب التعليم القائم على حل المشكلات، التعليم يدور حول الحالات الإكلينيكية                                                                                         | <input type="checkbox"/> | <input type="checkbox"/> | <input type="checkbox"/> |
| 4 | In the PBL curriculum the teacher is a central figure<br>في أسلوب التعليم القائم على حل المشكلات معلم المنهج هو جزء رئيسي                                                                                                                   | <input type="checkbox"/> | <input type="checkbox"/> | <input type="checkbox"/> |
| 5 | In the PBL curriculum, traditional lectures are an essential part of the teaching process<br>في منهج أسلوب التعليم القائم على حل المشكلات، المحاضرات التقليدية هي جزء لا غنى عنه في منظومة التعليم                                          | <input type="checkbox"/> | <input type="checkbox"/> | <input type="checkbox"/> |
| 6 | In the PBL curriculum, students learn skills through logical reasoning and critical analysis<br>في منهج أسلوب التعليم القائم على حل المشكلات، الطلاب يكتسبون مهارات عن طريق الاستنتاج المنطقي والتحليل النقدي.                              | <input type="checkbox"/> | <input type="checkbox"/> | <input type="checkbox"/> |
| 7 | The PBL is time-consuming<br>أسلوب التعليم القائم على حل المشكلات يستهلك وقتاً كبيراً                                                                                                                                                       | <input type="checkbox"/> | <input type="checkbox"/> | <input type="checkbox"/> |
| 8 | The PBL requires more manpower<br>يحتاج أسلوب التعليم القائم على حل المشكلات قوى عاملة وطاقات بشرية أكثر                                                                                                                                    | <input type="checkbox"/> | <input type="checkbox"/> | <input type="checkbox"/> |

|    |                                                                                                                                                                                                   |                          |                          |                          |
|----|---------------------------------------------------------------------------------------------------------------------------------------------------------------------------------------------------|--------------------------|--------------------------|--------------------------|
| 9  | The PBL enhances problem-solving abilities<br>أسلوب التعليم القائم على حل المشكلات يعزز قدرات حل المشكلات                                                                                         | <input type="checkbox"/> | <input type="checkbox"/> | <input type="checkbox"/> |
| 10 | The PBL encourages students to establish independent responsibility for their shared learning<br>أسلوب التعليم القائم على حل المشكلات يشجع المسؤولية المستقلة للتعليم المشترك                     | <input type="checkbox"/> | <input type="checkbox"/> | <input type="checkbox"/> |
| 11 | The PBL sessions are carried out in small group format<br>تتم جلسات التعليم القائم على حل المشكلات في مجموعات صغيرة                                                                               | <input type="checkbox"/> | <input type="checkbox"/> | <input type="checkbox"/> |
| 12 | The PBL reinforces interpersonal skills and teamwork<br>يعزز أسلوب التعليم القائم على حل المشكلات مهارات التعامل مع الآخرين والعمل الجماعي                                                        | <input type="checkbox"/> | <input type="checkbox"/> | <input type="checkbox"/> |
| 13 | In PBL, students learn leadership skills<br>في التعليم القائم على حل المشكلات، يكتسب الطلاب المهارات القيادية                                                                                     | <input type="checkbox"/> | <input type="checkbox"/> | <input type="checkbox"/> |
| 14 | In PBL sessions, all students must contribute in teaching and learning<br>في جلسات التعليم القائم على حل المشكلات، يجب على جميع الطلاب المساهمة في التدريس والتعلم                                | <input type="checkbox"/> | <input type="checkbox"/> | <input type="checkbox"/> |
| 15 | In PBL sessions, a student who contributes predominantly is appreciated<br>في جلسات التعليم القائم على حل المشكلات، الطالب الذي يساهم بالأغلب، يتم تقديره                                         | <input type="checkbox"/> | <input type="checkbox"/> | <input type="checkbox"/> |
| 16 | In PBL sessions, it is necessary for a facilitator to give students constructive feedback<br>في جلسات التعليم القائم على حل المشكلات، أمر مهم أن يعطي المشرف الطلاب تعقيبات وملاحظات بناءة        | <input type="checkbox"/> | <input type="checkbox"/> | <input type="checkbox"/> |
| 17 | In PBL sessions, it is necessary that students give each other mutual constructive feedback<br>في جلسات التعليم القائم على حل المشكلات، أمر مهم أن يعطي الطلاب بعضهم البعض تعقيبات وملاحظات بناءة | <input type="checkbox"/> | <input type="checkbox"/> | <input type="checkbox"/> |
| 18 | The PBL sessions are carried out without supervision of a facilitator<br>تتم جلسات التعليم القائم على حل المشكلات من دون اشراف شخص موجه                                                           | <input type="checkbox"/> | <input type="checkbox"/> | <input type="checkbox"/> |
| 19 | In PBL sessions, the role of a facilitator is as a leader of the group<br>في جلسات التعليم القائم على حل المشكلات، دور الشخص الموجه هو كقائد للمجموعة                                             | <input type="checkbox"/> | <input type="checkbox"/> | <input type="checkbox"/> |

|    |                                                                                                                                                                                                                                      |                          |                          |                          |
|----|--------------------------------------------------------------------------------------------------------------------------------------------------------------------------------------------------------------------------------------|--------------------------|--------------------------|--------------------------|
| 20 | In PBL sessions, the scribe leads the group<br>في جلسات التعليم القائم على حل المشكلات، الكاتب يقود المجموعة                                                                                                                         | <input type="checkbox"/> | <input type="checkbox"/> | <input type="checkbox"/> |
| 21 | In PBL sessions, students do independent and self-directed study before returning to group discussions<br>في جلسات التعليم القائم على حل المشكلات، الطلاب يقومون بالتعلم بصفة مستقلة وذاتية التوجيه قبل العودة للمناقشات مع المجموعة | <input type="checkbox"/> | <input type="checkbox"/> | <input type="checkbox"/> |
| 22 | The Case-based Learning (CBL) is a traditional method of learning<br>التعليم القائم على الحالات (CBL) هو أسلوب تعليم تقليدي                                                                                                          | <input type="checkbox"/> | <input type="checkbox"/> | <input type="checkbox"/> |
| 23 | CBL is an educational paradigm closely related to the PBL<br>أسلوب التعليم القائم على الحالات هو نموذج تعليمي يرتبط ارتباطاً وثيقاً بأسلوب التعليم القائم على حل المشكلات                                                            | <input type="checkbox"/> | <input type="checkbox"/> | <input type="checkbox"/> |
| 24 | CBL allows students to develop a collaborative, team-based approach to their education<br>يسمح نظام التعليم القائم على حل المشكلات بتطوير نهج تعليمي تعاوني قائم على الفريق.                                                         | <input type="checkbox"/> | <input type="checkbox"/> | <input type="checkbox"/> |
| 25 | Although PBL and CBL methods share common goals, they are different strategically<br>بالرغم من أن أسلوب التعليم القائم على حل المشكلات وأسلوب التعليم القائم على الحالات تتشارك في الأهداف، إلا أنهما مختلفان استراتيجياً            | <input type="checkbox"/> | <input type="checkbox"/> | <input type="checkbox"/> |
| 26 | Self-directed learning (SDL) has been suggested as a promising methodology for lifelong learning in medicine<br>تم اقتراح التعليم الذاتي (SDL) كمنهجية واعدة للتعلم مدى الحياة في الطب                                               | <input type="checkbox"/> | <input type="checkbox"/> | <input type="checkbox"/> |
| 27 | In SDL sessions, students learn by themselves<br>في جلسات التعليم الذاتي، الطلاب يتعلمون بأنفسهم                                                                                                                                     | <input type="checkbox"/> | <input type="checkbox"/> | <input type="checkbox"/> |

Part 3

Students' perception on curriculum, teaching approaches, and facilities in the UPPP at KSAU-HS after completion of 4<sup>th</sup> semester courses in the UPPP.

تصور الطلاب عن المنهج، طرق التدريس، والمرافق في البرنامج التحضيري (ما قبل المهني) في جامعة الملك سعود بن عبدالعزيز للعلوم الصحية.

|          | <b>Objective</b><br>الهدف                                                                                                                                                                                  | <b>1</b><br><b>Strongly agree</b><br>أوافق بشدة | <b>2</b><br><b>Agree</b><br>أوافق | <b>3</b><br><b>Don't agree</b><br>لا أوافق | <b>4</b><br><b>Don't know</b><br>لا أعلم |
|----------|------------------------------------------------------------------------------------------------------------------------------------------------------------------------------------------------------------|-------------------------------------------------|-----------------------------------|--------------------------------------------|------------------------------------------|
| <b>1</b> | Teaching methods in the UPPP helped you to move from didactic learning to interactive learning approaches<br>طرق التدريس في البرنامج التحضيري ساعدتك في الانتقال من التعليم التوجيهي إلى سبل تعليم تفاعلية | <input type="checkbox"/>                        | <input type="checkbox"/>          | <input type="checkbox"/>                   | <input type="checkbox"/>                 |
| <b>2</b> | Anatomy and physiology lectures as well as other basic medical sciences lectures were interactive<br>محاضرات علم التشريح ووظائف الأعضاء، ومحاضرات العلوم الطبية الأساسية الأخرى كانت تفاعلية               | <input type="checkbox"/>                        | <input type="checkbox"/>          | <input type="checkbox"/>                   | <input type="checkbox"/>                 |
| <b>3</b> | Anatomy laboratory sessions helped you to learn the structures in three-dimensional context<br>ساعدتك محاضرات مختبر التشريح على تعلم الهياكل في سياق ثلاثي الأبعاد                                         | <input type="checkbox"/>                        | <input type="checkbox"/>          | <input type="checkbox"/>                   | <input type="checkbox"/>                 |
| <b>4</b> | Physiology and other basic medical science practicals gave you an opportunity to have hands-on practice<br>تجارب علم وظائف الأعضاء والعلوم الطبية الأساسية الأخرى وفرت لك فرصة ممارسة تدريب عملي           | <input type="checkbox"/>                        | <input type="checkbox"/>          | <input type="checkbox"/>                   | <input type="checkbox"/>                 |
| <b>5</b> | Case-based Learning (CBL) sessions helped you to learn in clinical context<br>جلسات التعليم القائم على الحالات ساعدتك على التعلم في سياق إكلينيكي                                                          | <input type="checkbox"/>                        | <input type="checkbox"/>          | <input type="checkbox"/>                   | <input type="checkbox"/>                 |

|    |                                                                                                                                                                                                                                                                                                                                                                                                    |                          |                          |                          |                          |
|----|----------------------------------------------------------------------------------------------------------------------------------------------------------------------------------------------------------------------------------------------------------------------------------------------------------------------------------------------------------------------------------------------------|--------------------------|--------------------------|--------------------------|--------------------------|
| 6  | CBL sessions improved your communication skills and teamwork skills<br>طورت جلسات التعليم القائم على الحالات من مهاراتك التواصلية ومهارات العمل ضمن فريق لديك                                                                                                                                                                                                                                      | <input type="checkbox"/> | <input type="checkbox"/> | <input type="checkbox"/> | <input type="checkbox"/> |
| 7  | Self-directed learning (SDL) sessions helped and motivated you to become a self-learner<br>ساعدتك جلسات التعليم الذاتي وحفزتك لتصبح متعلم ذاتي                                                                                                                                                                                                                                                     | <input type="checkbox"/> | <input type="checkbox"/> | <input type="checkbox"/> | <input type="checkbox"/> |
| 8  | In the Health Professions Education course, you were introduced to basic philosophy of Problem-based Learning (PBL)<br>في مادة (Health Professions Education)، تم تعريفك على الفلسفة الأساسية لأسلوب التعليم القائم على المشكلات                                                                                                                                                                   | <input type="checkbox"/> | <input type="checkbox"/> | <input type="checkbox"/> | <input type="checkbox"/> |
| 9  | The Health Professions Education course introduced you to the various steps of PBL session<br>تم تعريفك في مادة (Health Professions Education) على الخطوات المختلفة في جلسات لأسلوب التعليم القائم على المشكلات                                                                                                                                                                                    | <input type="checkbox"/> | <input type="checkbox"/> | <input type="checkbox"/> | <input type="checkbox"/> |
| 10 | The Health Professions Education course introduced you to topics such as time management, group dynamics, principles of adult education and learning styles, leadership skills, and giving constructive feedback<br>تم تعريفك في مادة Health Professions Education على مواضيع مثل تنظيم الوقت، ديناميكيات المجموعة، ومبادئ تعليم الكبار وأنماط التعلم، ومهارات القيادة، وكيفية إعطاء ملاحظات بناءة | <input type="checkbox"/> | <input type="checkbox"/> | <input type="checkbox"/> | <input type="checkbox"/> |
| 11 | Observation of live PBL sessions helped you to adjust easily to PBL system<br>ساعدك مراقبة جلسات أسلوب التعليم القائم على المشكلات الحية على التكيف بسهولة مع نظام التعليم القائم على المشكلات                                                                                                                                                                                                     | <input type="checkbox"/> | <input type="checkbox"/> | <input type="checkbox"/> | <input type="checkbox"/> |

|    |                                                                                                                                                                                                                                                                                 |                          |                          |                          |                          |
|----|---------------------------------------------------------------------------------------------------------------------------------------------------------------------------------------------------------------------------------------------------------------------------------|--------------------------|--------------------------|--------------------------|--------------------------|
| 12 | <p>The UPPP helped you develop your skills in problem solving and shaped your attitudes to suite tomorrow's healthcare professions</p> <p>ساعدك برنامج السنة التحضيرية على تطوير مهارات حل المشكلات لديك وساهمت في تشكيل سلوكياتك لملائمة مهن الرعاية الصحية مستقبلاً</p>       | <input type="checkbox"/> | <input type="checkbox"/> | <input type="checkbox"/> | <input type="checkbox"/> |
| 13 | <p>In the UPPP, the core facilities such as black board, anatomy.TV and library were helpful in contextual learning</p> <p>في برنامج السنة التحضيرية، المرافق الأساسية مثل ال Black Board ،anatomy. TV، والمكتبة كانت مفيدة في تعلم المحتوى</p>                                 | <input type="checkbox"/> | <input type="checkbox"/> | <input type="checkbox"/> | <input type="checkbox"/> |
| 14 | <p>Continuous and final assessment were structured</p> <p>التقييم المستمر والتقييم النهائي كانا منظمين</p>                                                                                                                                                                      | <input type="checkbox"/> | <input type="checkbox"/> | <input type="checkbox"/> | <input type="checkbox"/> |
| 15 | <p>Continuous and final assessment were matched with teaching strategies</p> <p>تمت مطابقة التقييم المستمر والنهائي مع استراتيجيات التدريس</p>                                                                                                                                  | <input type="checkbox"/> | <input type="checkbox"/> | <input type="checkbox"/> | <input type="checkbox"/> |
| 16 | <p>In the UPPP, you learnt appropriately the fundamentals of anatomy, physiology, biochemistry, pharmacology, and pathology</p> <p>في البرنامج التحضيري، تعلمت بشكل مناسب أساسيات علم التشريح، وعلم وظائف الأعضاء، والكيمياء الحيوية، وعلم الصيدلة، وعلم الأمراض</p>            | <input type="checkbox"/> | <input type="checkbox"/> | <input type="checkbox"/> | <input type="checkbox"/> |
| 17 | <p>The basic medical science courses which you studied in the UPPP were essential for pursuing studies in the forthcoming professional colleges</p> <p>دورات العلوم الطبية الأساسية التي درستها في البرنامج التحضيري كانت ضرورية لمتابعة الدراسة في الكليات المهنية القادمة</p> | <input type="checkbox"/> | <input type="checkbox"/> | <input type="checkbox"/> | <input type="checkbox"/> |
| 18 | <p>As a whole, you are satisfied by the UPPP</p> <p>بالمجمل، أنت راضٍ عن البرنامج التحضيري</p>                                                                                                                                                                                  | <input type="checkbox"/> | <input type="checkbox"/> | <input type="checkbox"/> | <input type="checkbox"/> |

|    |                                                                                                          |                          |                          |                          |                          |
|----|----------------------------------------------------------------------------------------------------------|--------------------------|--------------------------|--------------------------|--------------------------|
| 19 | Are there any major flaws in the UPPP?<br>هل كان هنالك أي خلل أو عيوب في البرنامج التحضيري؟              | <input type="checkbox"/> | <input type="checkbox"/> | <input type="checkbox"/> | <input type="checkbox"/> |
| 20 | Any other comments you have for improving the UPPP:<br>أي تعليقات أخرى تمتلكها لتطوير البرنامج التحضيري: |                          |                          |                          |                          |
